# Supplementary material for: The structuring effect of the alkyl domains on the polar network of ionic liquid mixtures: a molecular dynamics study
Source: Royal Society of Chemistry journal article supplement (doi:10.1039/d2cp02786k), 2022-01-01
Supplement: d2cp02786k1.pdf [file d2cp02786k1.pdf]

## Structuring Effect of the Alkyl Domains on the Polar Network of Ionic Liquids Mixtures: a Molecular Dynamics Study

Valerio Mazzilli,<sup>a,b</sup> Yanting Wang<sup>c,d</sup> and Giacomo Saielli<sup>\*a,b</sup>

### Supporting Information

|                                                                                |      |
|--------------------------------------------------------------------------------|------|
| <b>Figure S1</b> , RDF involving the terminal methyl carbon                    | p. 2 |
| <b>Table S1</b> , peak maxima in RDF                                           | p. 3 |
| <b>Figure S2</b> , RDF of the distance between the anion and the cation's ring | p. 4 |
| <b>Table S2</b> , Diffusion coefficient ratios                                 | p. 5 |

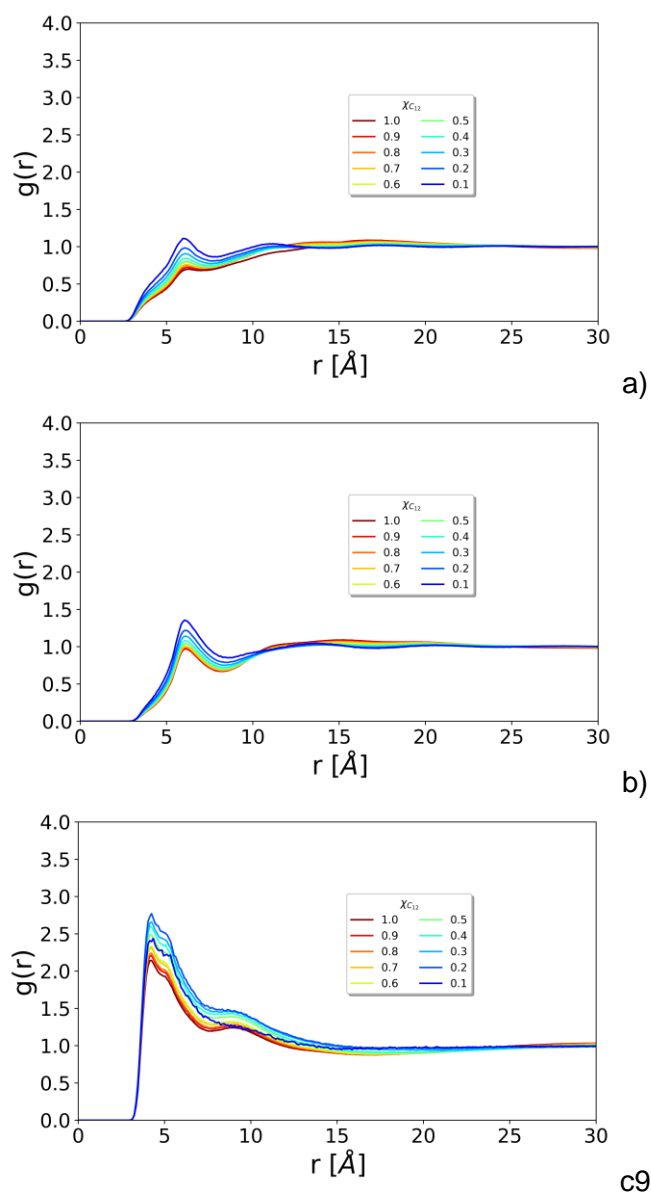

**Figure S1.** A) RDF of the  $C_{12}'$ -N distance between  $[C_{12}C_1im]$  alkyl chain and anions; b) RDF of the  $C_{12}'$ - $C_2$  distance between  $[C_{12}C_1im]$  alkyl chain and imidazolium heads (irrespective of being  $[C_{12}C_1im]$  or  $[C_1C_1im]$ ); c) RDF of the  $C_{12}'$ - $C_{12}'$  distance between two alkyl chains. (see Figure 1 of the main text for atom numbering).

**Table S1.** Peak position of the RDF in Figure 3a) of the main text. The RDF x-axis resolution (that is the discretization of the distance) is 0.1 Å.

| $x_{C12}$ | Peak position (Å) |
|-----------|-------------------|
| 1.0       | $6.95 \pm 0.05$   |
| 0.9       | $6.95 \pm 0.05$   |
| 0.8       | $7.05 \pm 0.05$   |
| 0.7       | $7.05 \pm 0.05$   |
| 0.6       | $7.05 \pm 0.05$   |
| 0.5       | $7.05 \pm 0.05$   |
| 0.4       | $7.15 \pm 0.05$   |
| 0.3       | $7.15 \pm 0.05$   |
| 0.2       | $7.15 \pm 0.05$   |
| 0.1       | $7.25 \pm 0.05$   |
| 0.0       | $7.25 \pm 0.05$   |

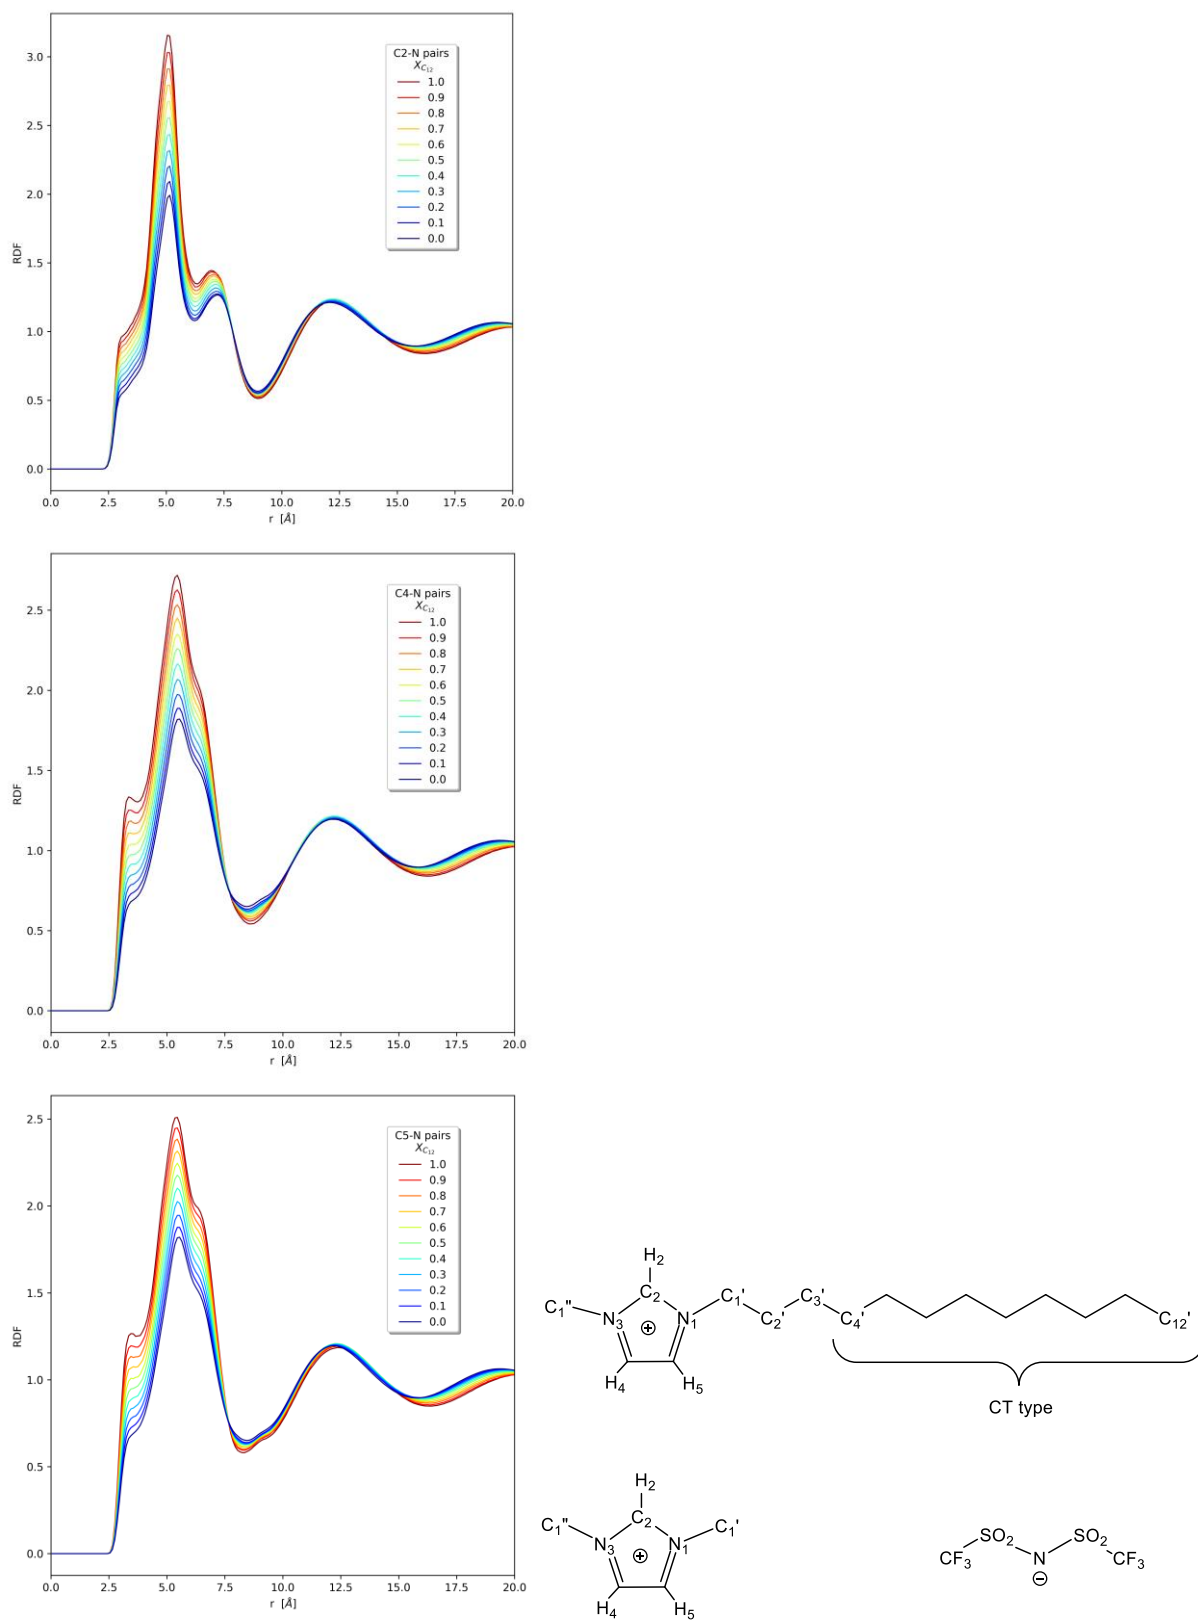

**Figure S2.** RDF of the distance between the anion's nitrogen and the three carbons of the cationic ring. (Top) N-C2; (middle) N-C4; (bottom) N-C5, see scheme on the right for atom numbering.

**Table S2.** Diffusion coefficient ratios. C12 = [C<sub>12</sub>C<sub>1</sub>im] cation; C1 = [C<sub>1</sub>C<sub>1</sub>im] cation; Tf<sub>2</sub>N = anion.

|     | D(C12)/D(C1) | D(C12)/D(Tf <sub>2</sub> N) | D(C1)/D(Tf <sub>2</sub> N) |
|-----|--------------|-----------------------------|----------------------------|
| 1.0 |              | 0.77                        |                            |
| 0.9 | 0.56         | 0.71                        | 0.79                       |
| 0.8 | 0.54         | 0.75                        | 0.71                       |
| 0.7 | 0.62         | 0.77                        | 0.80                       |
| 0.6 | 0.55         | 0.69                        | 0.82                       |
| 0.5 | 0.50         | 0.64                        | 0.78                       |
| 0.4 | 0.53         | 0.75                        | 0.71                       |
| 0.3 | 0.53         | 0.76                        | 0.69                       |
| 0.2 | 0.52         | 0.74                        | 0.70                       |
| 0.1 | 0.51         | 0.78                        | 0.65                       |
| 0.0 |              |                             | 0.64                       |
